# Supplementary material
Source: publisher figshare collection journal article supplement (https://sage.figshare.com/ndownloader/files/16861604)
Supplement: Supplementary file 1 [file 16861604]

## Appendix

**Table A1**

Summary of Scales from Survey Items

| Scale                                 | Summary                                                                                     | Items                                                                                                                                                                                                                                                                                                                                                                                                                                                                                                                                                                                                                                                                                                                                            |
|---------------------------------------|---------------------------------------------------------------------------------------------|--------------------------------------------------------------------------------------------------------------------------------------------------------------------------------------------------------------------------------------------------------------------------------------------------------------------------------------------------------------------------------------------------------------------------------------------------------------------------------------------------------------------------------------------------------------------------------------------------------------------------------------------------------------------------------------------------------------------------------------------------|
| Helpfulness<br><br>( $\alpha = .96$ ) | Candidates' perceptions of how useful edTPA was in their preparation for becoming a teacher | <ul style="list-style-type: none"> <li>• edTPA helped me to become a stronger teacher</li> <br/> <li>• On the whole, edTPA was aligned with my teacher education program's approach to teaching</li> <li>• edTPA was worthwhile in my development as a teacher</li> <li>• edTPA helped me connect ideas across my teacher preparation</li> <li>• edTPA helped me make connections between educational theory and my experience student teaching</li> <li>• edTPA helped me reflect upon my own understanding of teaching</li> <li>• edTPA helped me reflect upon my own understanding of student learning</li> <li>• edTPA better prepared me to teach diverse students</li> <li>• edTPA better prepared me to plan and teach lessons</li> </ul> |

|                                 |                                                                                                                              |                                                                                                                                                                                                                                                                                                                                                                                                                                                                                                                                                                                                                                                                                                                                                                            |
|---------------------------------|------------------------------------------------------------------------------------------------------------------------------|----------------------------------------------------------------------------------------------------------------------------------------------------------------------------------------------------------------------------------------------------------------------------------------------------------------------------------------------------------------------------------------------------------------------------------------------------------------------------------------------------------------------------------------------------------------------------------------------------------------------------------------------------------------------------------------------------------------------------------------------------------------------------|
| Alignment<br>( $\alpha = .90$ ) | Candidates' perceptions of whether edTPA aligned with the other preparation they were receiving (i.e. coursework, placement) | <ul style="list-style-type: none"><li>• edTPA provided an opportunity for my personal professional development</li><li>• edTPA provided an opportunity to reflect upon my own teaching practice</li><li>• edTPA helped me to become a stronger teacher</li><li>• edTPA helped me design assessments and use information from assessments in instructional planning</li><li>• edTPA was a focus of my coursework throughout my teacher preparation program</li><br/><li>• My program emphasized edTPA as a valuable tool for my development as a teacher</li><li>• My program emphasized edTPA as a necessary requirement for graduation</li><li>• I had the support needed to complete edTPA successfully</li><li>• Focused heavily on edTPA during the semester</li></ul> |
|---------------------------------|------------------------------------------------------------------------------------------------------------------------------|----------------------------------------------------------------------------------------------------------------------------------------------------------------------------------------------------------------------------------------------------------------------------------------------------------------------------------------------------------------------------------------------------------------------------------------------------------------------------------------------------------------------------------------------------------------------------------------------------------------------------------------------------------------------------------------------------------------------------------------------------------------------------|

|                                                                        |                                                                                   |                                                                                                                                                                                                                                                                                                                                                                                                                                                                                       |
|------------------------------------------------------------------------|-----------------------------------------------------------------------------------|---------------------------------------------------------------------------------------------------------------------------------------------------------------------------------------------------------------------------------------------------------------------------------------------------------------------------------------------------------------------------------------------------------------------------------------------------------------------------------------|
| <p>University<br/>supervisor<br/><br/>(<math>\alpha = .86</math>)</p>  | <p>Candidates' perceived support from<br/>their university supervisor</p>         | <ul style="list-style-type: none"> <li>• Mentioned edTPA in course discussions</li> <li>• Gave course assignments related to edTPA</li> <li>• Were helpful in supporting my completion of edTPA</li> <li>• Were knowledgeable about what I was required to do in edTPA</li> <li>• Valued edTPA as a worthwhile part of teacher preparation</li> <li>• My instructors mentioned edTPA in course discussions</li> <li>• My supervisor gave me useful feedback on my teaching</li> </ul> |
| <p>Programmatic<br/>coherence<br/><br/>(<math>\alpha = .73</math>)</p> | <p>Candidates' perceptions of whether<br/>their teacher education program was</p> | <ul style="list-style-type: none"> <li>• My supervisor was available to talk with me when I had questions or concerns about teaching</li> <li>• My supervisor observed me on a regular basis</li> <li>• My supervisor provided useful feedback on components of my edTPA</li> <li>• My program articulates a clear vision of teaching and learning</li> </ul>                                                                                                                         |

cohesive in its goals, mission, and expectations

- I hear similar views about teaching and learning across courses
- What I learn in methods courses reflects what I observe in my student teaching placement
- The criteria by which I am evaluated as a student teacher are consistent with what I am taught in my methods courses

Placement  
( $\alpha = .85$ )

Candidates' perceptions of whether their placement was in line with their expectations and desires for future classroom placements

- Student teaching placement consistent with your career teaching plans in terms of students' academic performance
  - Student teaching placement consistent with your career teaching plans in terms of students' race/ethnicity
  - Student teaching placement consistent with your career teaching plans in terms of students' socioeconomic status
-

**Table A2**

Confirmatory Factor Analysis of Perceptions of Preparation and Working with SWLDs

| Factor  | University  |           | Program    |           |           |    |
|---------|-------------|-----------|------------|-----------|-----------|----|
|         | Helpfulness | Alignment | supervisor | coherence | Placement | LD |
| Item 1  | 0.66        | —         | —          | —         | —         | —  |
| Item 2  | 0.84        | —         | —          | —         | —         | —  |
| Item 3  | 0.82        | —         | —          | —         | —         | —  |
| Item 4  | 0.74        | —         | —          | —         | —         | —  |
| Item 5  | 0.77        | —         | —          | —         | —         | —  |
| Item 6  | 0.82        | —         | —          | —         | —         | —  |
| Item 7  | 0.79        | —         | —          | —         | —         | —  |
| Item 8  | 0.79        | —         | —          | —         | —         | —  |
| Item 9  | 0.80        | —         | —          | —         | —         | —  |
| Item 10 | 0.75        | —         | —          | —         | —         | —  |
| Item 11 | 0.78        | —         | —          | —         | —         | —  |
| Item 12 | 0.79        | —         | —          | —         | —         | —  |
| Item 13 | 0.63        | —         | —          | —         | —         | —  |

|         |   |      |      |      |   |   |
|---------|---|------|------|------|---|---|
| Item 14 | — | 0.72 | —    | —    | — | — |
| Item 15 | — | 0.73 | —    | —    | — | — |
| Item 16 | — | 0.68 | —    | —    | — | — |
| Item 17 | — | 0.53 | —    | —    | — | — |
| Item 18 | — | 0.65 | —    | —    | — | — |
| Item 19 | — | 0.50 | —    | —    | — | — |
| Item 20 | — | 0.53 | —    | —    | — | — |
| Item 21 | — | 0.36 | —    | —    | — | — |
| Item 22 | — | 0.53 | —    | —    | — | — |
| Item 23 | — | 0.52 | —    | —    | — | — |
| Item 24 | — | 0.53 | —    | —    | — | — |
| Item 25 | — | —    | 0.51 | —    | — | — |
| Item 26 | — | —    | 0.69 | —    | — | — |
| Item 27 | — | —    | 0.53 | —    | — | — |
| Item 28 | — | —    | 0.72 | —    | — | — |
| Item 29 | — | —    | —    | 0.51 | — | — |
| Item 30 | — | —    | —    | 0.52 | — | — |

|         |   |   |   |      |      |      |
|---------|---|---|---|------|------|------|
| Item 31 | — | — | — | 0.75 | —    | —    |
| Item 32 | — | — | — | 0.63 | —    | —    |
| Item 33 | — | — | — | —    | 0.73 | —    |
| Item 34 | — | — | — | —    | 0.83 | —    |
| Item 35 | — | — | — | —    | 0.66 | —    |
| Item 36 | — | — | — | —    | —    | 0.75 |
| Item 37 | — | — | — | —    | —    | 0.82 |
| Item 38 | — | — | — | —    | —    | 0.67 |
| Item 39 | — | — | — | —    | —    | 0.69 |

---

*Note:* Item numbers correspond to items listed in Appendix Table A1.
